# Supplementary material for: Association between Obstructive Sleep Apnea and Type 2 Diabetes Mellitus: A Dose-Response Meta-Analysis
Source: Evid Based Complement Alternat Med. 2021 Sep 30;2021:1337118. doi: 10.1155/2021/1337118 (PMC8497107; doi:10.1155/2021/1337118)
Supplement: Supplementary Materials — Seven articles were identified with our meta-analysis criteria in total (Supplementary Materials 1). The search strategy in PubMed is shown in Supplementary Materials 2. [file 1337118.f1.zip]

Archive with 2 entries (2 files):
- 1337118.f1/supplementary material 1.doc
- 1337118.f1/supplementary material 2.doc
